# Supplementary material for: Adolescent–Parent Agreement on Callous–Unemotional Traits in Adolescents with Attention-Deficit/Hyperactivity Disorder
Source: MDPI journal article supplement (doi:10.3390/ijerph17113888), 2020-05-30
Supplement: s1 [file s1]

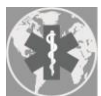

**Table 1.** Adolescent–parent agreement ratings on every items of the Chinese version of the Inventory of Callous and Unemotional Traits.

|                                                             | Adolescent-Report<br>Mean (SD) | Parent-Report<br>Mean (SD) | Paired <i>t</i> | <i>P</i> | ICC   |
|-------------------------------------------------------------|--------------------------------|----------------------------|-----------------|----------|-------|
| 1. Expressing feelings openly                               | 1.3 (0.9)                      | 1.5 (0.9)                  | −4.332          | <0.001   | 0.207 |
| 2. Thinking different about "right" and "wrong" from others | 1.3 (0.9)                      | 1.3 (0.9)                  | 1.238           | 0.216    | 0.158 |
| 3. Caring about doing well at school or work                | 1.7 (1.0)                      | 1.6 (0.9)                  | 1.228           | 0.220    | 0.272 |
| 4. Not caring about hurting others to get somethings        | 0.4 (0.8)                      | 0.5 (0.8)                  | −2.525          | 0.012    | 0.258 |
| 5. Feeling bad or guilty when doing something wrong         | 1.8 (1.0)                      | 1.7 (0.9)                  | 1.861           | 0.063    | 0.136 |
| 6. Not showing emotions to others                           | 1.1 (0.9)                      | 1.0 (0.9)                  | 3.274           | 0.001    | 0.104 |
| 7. Not caring about being on time.                          | 0.6 (0.9)                      | 1.0 (1.0)                  | −7.280          | <0.001   | 0.262 |
| 8. Being concerned about the feelings of others             | 1.8 (1.0)                      | 1.5 (0.9)                  | 5.848           | <0.001   | 0.201 |
| 9. Not caring about getting into trouble                    | 0.6 (0.9)                      | 0.9 (0.9)                  | −6.230          | <0.001   | 0.232 |
| 10. Not being controlled by feeling                         | 1.2 (0.9)                      | 0.9 (0.8)                  | 6.786           | <0.001   | 0.174 |
| 11. Not caring about doing things well                      | 0.6 (0.8)                      | 1.0 (0.9)                  | −8.418          | <0.001   | 0.195 |
| 12. Being cold and uncaring to others                       | 0.6 (0.9)                      | 0.6 (0.8)                  | 0.580           | 0.562    | 0.270 |
| 13. Easily admitted to being wrong.                         | 1.3 (1.0)                      | 1.1 (0.9)                  | 4.847           | <0.001   | 0.241 |
| 14. Being easy for others to tell my feeling                | 1.3 (0.9)                      | 1.7 (0.9)                  | −8.981          | <0.001   | 0.148 |
| 15. Always trying best                                      | 1.8 (0.9)                      | 1.3 (0.9)                  | 10.713          | <0.001   | 0.270 |
| 16. Apologizing to hurting persons.                         | 2.0 (0.9)                      | 1.7 (0.9)                  | 6.686           | <0.001   | 0.308 |
| 17. Trying not to hurt others' feeling                      | 1.9 (1.0)                      | 1.5 (0.9)                  | 8.591           | <0.001   | 0.321 |
| 18. Not feeling remorseful when doing something wrong       | 0.5 (0.8)                      | 0.7 (0.8)                  | −4.837          | <0.001   | 0.214 |
| 19. Being expressive and emotional                          | 1.5 (1.0)                      | 1.5 (1.0)                  | −0.609          | 0.543    | 0.193 |
| 20. Not like to put the time into doing things well         | 0.7 (0.9)                      | 1.1 (1.0)                  | −9.162          | <0.001   | 0.227 |
| 21. Not thinking the feelings of others important           | 0.5 (0.8)                      | 1.1 (1.0)                  | −11.959         | <0.001   | 0.241 |
| 22. Hiding feelings from others                             | 1.2 (1.0)                      | 1.0 (0.9)                  | 2.449           | 0.015    | 0.179 |
| 23. Working hard on everything                              | 1.8 (0.9)                      | 1.4 (0.9)                  | 8.852           | <0.001   | 0.310 |
| 24. Doing things to make others feel good                   | 1.6 (0.9)                      | 1.2 (0.8)                  | 7.541           | <0.001   | 0.254 |

ICC: Intraclass correlation; SD: standard deviation.
